# Supplementary material for: Central Nervous System Actions of Leptin Improve Cardiac Function After Ischemia–Reperfusion: Roles of Sympathetic Innervation and Sex Differences
Source: PubMed Central journal article supplement — J Am Heart Assoc. 2022 Oct 27;11(21):e027081. doi: 10.1161/JAHA.122.027081 (PMC9673649; doi:10.1161/jaha.122.027081), 2022-10-27
Supplement: JAH3-11-e027081-s002.pdf [file JAH3-11-e027081-s002.pdf]

# **SUPPLEMENTAL MATERIAL**

### **Supplemental Video Legends:**

**Video S1. Four-dimensional ultrasound derived-strain map in leptin-treated animal obtained 4 weeks after I/R injury.** The blue color indicates increased surface area strain. Best viewed with Windows Media Player.

**Video S2. Four-dimensional ultrasound derived-strain map in vehicle-treated animal obtained 4 weeks after I/R injury.** The red color indicates decreased surface area strain. Best viewed with Windows Media Player.
